# Supplementary material for: Atomistic observation of defect evolution during solidification in semiconductor InAs
Source: Royal Society of Chemistry journal article supplement (doi:10.1039/d5nr02745d), 2025-01-01
Supplement: d5nr02745d2.pdf [file d5nr02745d2.pdf]

## **Atomistic observation of defects evolution during solidification in Semiconductor InAs**

Changxin Han<sup>a</sup>, Bohua Zhang<sup>a</sup>, He Zheng<sup>b</sup>, Scott. X. Mao<sup>a,b</sup> \*

- a. School of Materials Engineering, Purdue University, West Lafayette, IN 47907, United States.
- b. Dept of Mechanical Engineering and Materials Science, University of Pittsburgh, Pittsburgh, Pennsylvania 15261, United State.

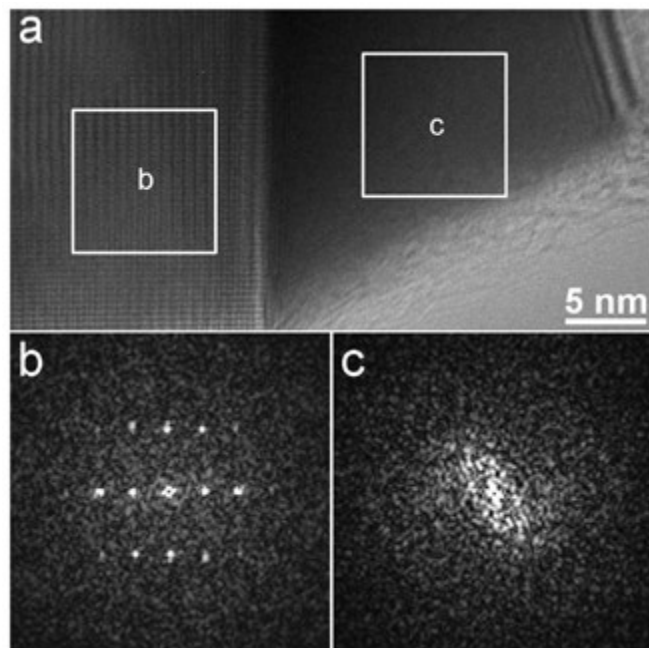

Figure S1. (a) A typical HRTEM image of the InAs with melted liquid. (b-c) Fast Fourier transform (FFT) images of InAs and liquid (white-boxed areas in (a)), respectively.
